# Supplementary material for: The prostaglandin synthases, COX-2 and L-PGDS, mediate prostate hyperplasia induced by low-dose bisphenol A
Source: PubMed Central journal article supplement (PMC7403327; doi:10.1038/s41598-020-69809-y), 2020-08-04
Supplement: 41598_2020_69809_MOESM1_ESM.pdf [file 41598_2020_69809_MOESM1_ESM.pdf]

## Supplementary Information

### The prostaglandin synthases, COX-2 and L-PGDS, mediate prostate hyperplasia induced by low-dose bisphenol A

*Shuangshuang Wu*<sup>1,2,3,4</sup>, *Dongyan Huang*<sup>2,3,4</sup>, *Xin Su*<sup>2,3,4</sup>, *Han Yan*<sup>2,3,4</sup>, *Aicui Ma*<sup>2,3,4</sup>,  
*Lei Li*<sup>2,3,4</sup>, *Jianhui Wu*<sup>2,3,4\*</sup>, and *Zuyue Sun*<sup>2,3,4</sup>

1. Pharmacy School of Fudan University, Shanghai 201203, China; 2. National Evaluation Centre for Toxicology of Fertility Regulating Drugs, Shanghai Institute of Planned Parenthood Research, Shanghai 200032, China; 3. Key Laboratory of Reproduction Regulation of NPFPC, Shanghai 200032, China; 4. Reproductive and Developmental Research Institute of Fudan University, Shanghai 200032, China

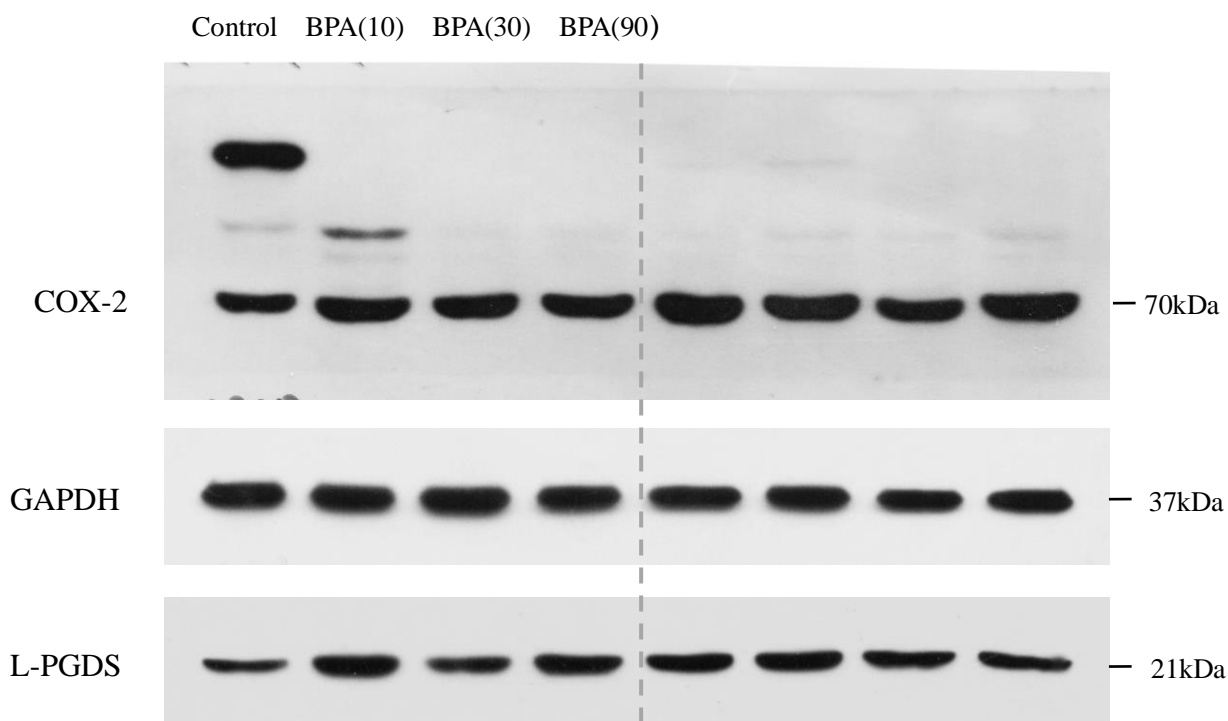

**Figure 1. Original gel of Fig 7d in manuscript.**

\*Correspondence should be addressed to Jianhui Wu, Researcher, Tel: +86-21-64048232, E-mail: [wujh\\_731@163.com](mailto:wujh_731@163.com).

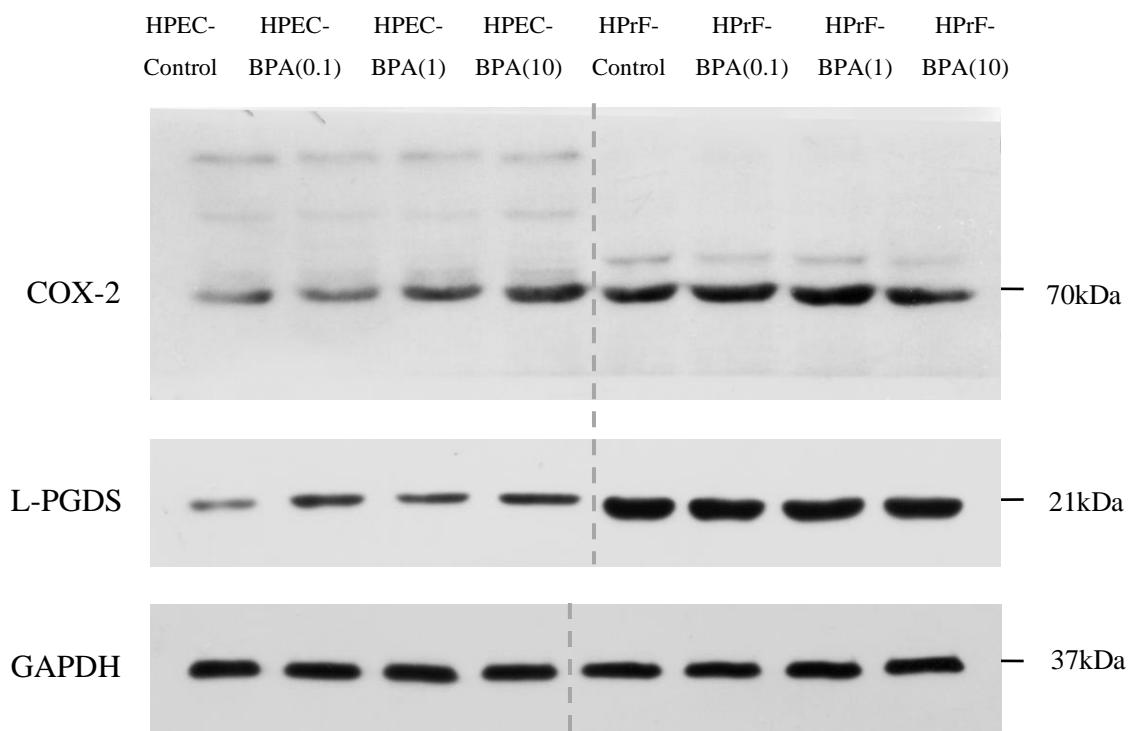

**Figure 2. Original gel of Fig 9b,9d in manuscript.**

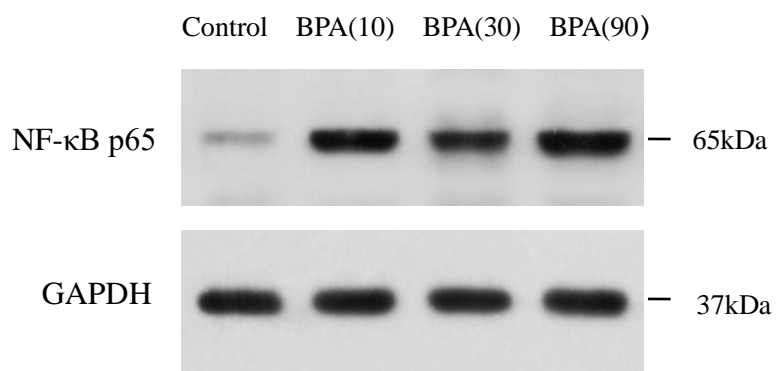

**Figure 3. Original gel of Fig 8b in manuscript.**
